# Supplementary material for: Spermidine Prevents Heart Injury in Neonatal Rats Exposed to Intrauterine Hypoxia by Inhibiting Oxidative Stress and Mitochondrial Fragmentation
Source: Hindawi journal article supplement (doi:10.1155/2019/5406468), 2019-05-14
Supplement: f1 [file 5406468.f1.pdf]

**The statistical analysis of the difference between Hpx-Spd group and Control group,**

**Hpx-Spd-DFMO group and Control, and Hpx-Spd-DFMO group and Hpx group.**

1. Statistical analysis of the changes of body weight

Hpx-Spd vs. Con,  $P < 0.05$

Hpx-Spd-DFMO vs. Con  $P < 0.05$

Hpx-Spd-DFMO vs. Hpx  $P > 0.05$

2. Statistical analysis of changes of heart weight

Hpx-Spd vs. Con,  $P < 0.05$

Hpx-Spd-DFMO vs. Con,  $P < 0.05$

Hpx-Spd-DFMO vs. Hpx,  $P > 0.05$

3. Statistical analysis of changes of HW/BW

Hpx-Spd vs. Con,  $P < 0.05$

Hpx-Spd-DFMO vs. Con,  $P < 0.05$

Hpx-Spd-DFMO vs. Hpx,  $P > 0.05$

4. Statistical analysis of the changes of binucleated cardiomyocytes

Hpx-Spd vs. Con  $P > 0.05$

Hpx-Spd-DFMO vs. Con  $P < 0.05$

Hpx-Spd-DFMO vs. Hpx  $P > 0.05$

5. Statistical analysis of the changes of the percentage of MCM2-positive cells

Hpx-Spd vs. Con,  $P > 0.05$

Hpx-Spd-DFMO vs. Con,  $P < 0.05$

Hpx-Spd-DFMO vs. Hpx,  $P > 0.05$

6. Statistical analysis of the changes of the percentage of TUNEL-positive nuclei

Hpx-Spd vs. Con,  $P > 0.05$

Hpx-Spd-DFMO vs. Con,  $P < 0.05$

Hpx-Spd-DFMO vs. Hpx,  $P > 0.05$

7. Statistical analysis of the changes of the expression of BAX and BCL2 proteins

Hpx-Spd vs. Con,  $P > 0.05$

Hpx-Spd-DFMO vs. Con,  $P < 0.05$

Hpx-Spd-DFMO vs. Hpx,  $P < 0.05$

8. Statistical analysis of the changes of interstitial fibrotic areas in ventricle sections

Con versus Hpx-Spd vs. Con,  $P > 0.05$

Hpx-Spd-DFMO vs. Con,  $P < 0.05$

Hpx-Spd-DFMO vs. Hpx,  $P > 0.05$

9. Statistical analysis of the quantification of the area of cells occupied by mitochondria (%)

Hpx-Spd vs. Con,  $P > 0.05$

Hpx-Spd-DFMO vs. Con,  $P < 0.05$

Hpx-Spd-DFMO vs. Hpx,  $P > 0.05$

10. Statistical analysis of the changes of the quantitative mitochondrial area

Hpx-Spd vs. Con,  $P > 0.05$

Hpx-Spd-DFMO vs. Con,  $P < 0.05$

Hpx-Spd-DFMO vs. Hpx,  $P > 0.05$

11. Statistical analysis of the changes of mitochondrial state 3 respiration

Hpx-Spd vs. Con,  $P > 0.05$

Hpx-Spd-DFMO vs. Con,  $P > 0.05$

Hpx-Spd-DFMO vs. Hpx,  $P > 0.05$

## 12. Statistical analysis of the changes of mitochondrial state 4 respiration

Hpx-Spd vs. Con,  $P > 0.05$

Hpx-Spd-DFMO vs. Con,  $P > 0.05$

Hpx-Spd-DFMO vs. Hpx,  $P > 0.05$

## 13. Statistical analysis of the changes of the respiratory control rate (RCR)

Hpx-Spd vs. Con,  $P > 0.05$

Hpx-Spd-DFMO vs. Con,  $P > 0.05$

Hpx-Spd-DFMO vs. Hpx,  $P > 0.05$

## 14. Statistical analysis of the changes of SOD proteins expression

Con versus Hpx-Spd,  $P > 0.05$

Con versus Hpx-Spd-DFMO,  $P < 0.05$

Hpx versus Hpx-Spd-DFMO,  $P > 0.05$

## 15 Statistical analysis of the expression changes of Mfn2, Fis1, Drp1 and PGC-1 $\alpha$ protein in cardiac tissue

Hpx-Spd vs. Con:

Mfn2,  $P > 0.05$ ; Fis1,  $P > 0.05$ ; Drp1,  $P > 0.05$ ; PGC-1 $\alpha$ ,  $P > 0.05$

Hpx-Spd-DFMO vs. Con:

Mfn2,  $P < 0.01$ ; Fis1,  $P > 0.05$ ; Drp1,  $P > 0.05$ ; PGC-1 $\alpha$ ,  $P < 0.001$

Hpx-Spd-DFMO vs. Hpx:

Mfn2,  $P > 0.05$ ; Fis1,  $P > 0.05$ ; Drp1,  $P > 0.05$ ; PGC-1 $\alpha$ ,  $P > 0.05$
